# Supplementary material
Source: publisher site journal article supplement (https://www.spandidos-publications.com/205/downloadSupplementary)
Supplement: Supplementary file 1 [file downloadSupplementary]

Figure S1. Effect of UV treatment on cell morphology and function. Primary human hepatocytes cultured on 10 J/cm<sup>2</sup> UV-treated MDS atelocollagen exhibited an elongated shape and a diminished function, in line with the findings of cells grown on conventional 0.04 mg/cm<sup>2</sup> atelocollagen. (A-E) LIVE/DEAD staining of day 1 culture of PHHs. MDS atelocollagen (2 mg/cm<sup>2</sup>) was exposed to UV as follows: (A) untreated, (B) 0.1 J/cm<sup>2</sup>, (C) 1 J/cm<sup>2</sup>, and (D) 10 J/cm<sup>2</sup>. (E) Conventional 0.04 mg/cm<sup>2</sup> atelocollagen was treated with 1 J/cm<sup>2</sup> UV as a control. PHHs (1x10<sup>5</sup> cells/well) were cultured on collagen for 1 day. Live cells were stained with calcein AM (green), and dead cells were stained with ethidium homodimer (red). Nuclei were stained with Hoechst (blue). Scale bar: 100  $\mu$ m. (F) RT-qPCR analysis of day 3 PHHs. PHHs cultured on 2 mg/cm<sup>2</sup> MDS atelocollagen exposed to 10 J/cm<sup>2</sup> UV radiation exhibited decreased hepatic gene expression, in line with that observed in cells grown on 0.04 mg/cm<sup>2</sup> conventional collagen (control). N=4. PHHs, primary human hepatocytes; MDS, micro-dimpled surface; RT-qPCR, reverse transcription-quantitative polymerase chain reaction; UV, ultraviolet.

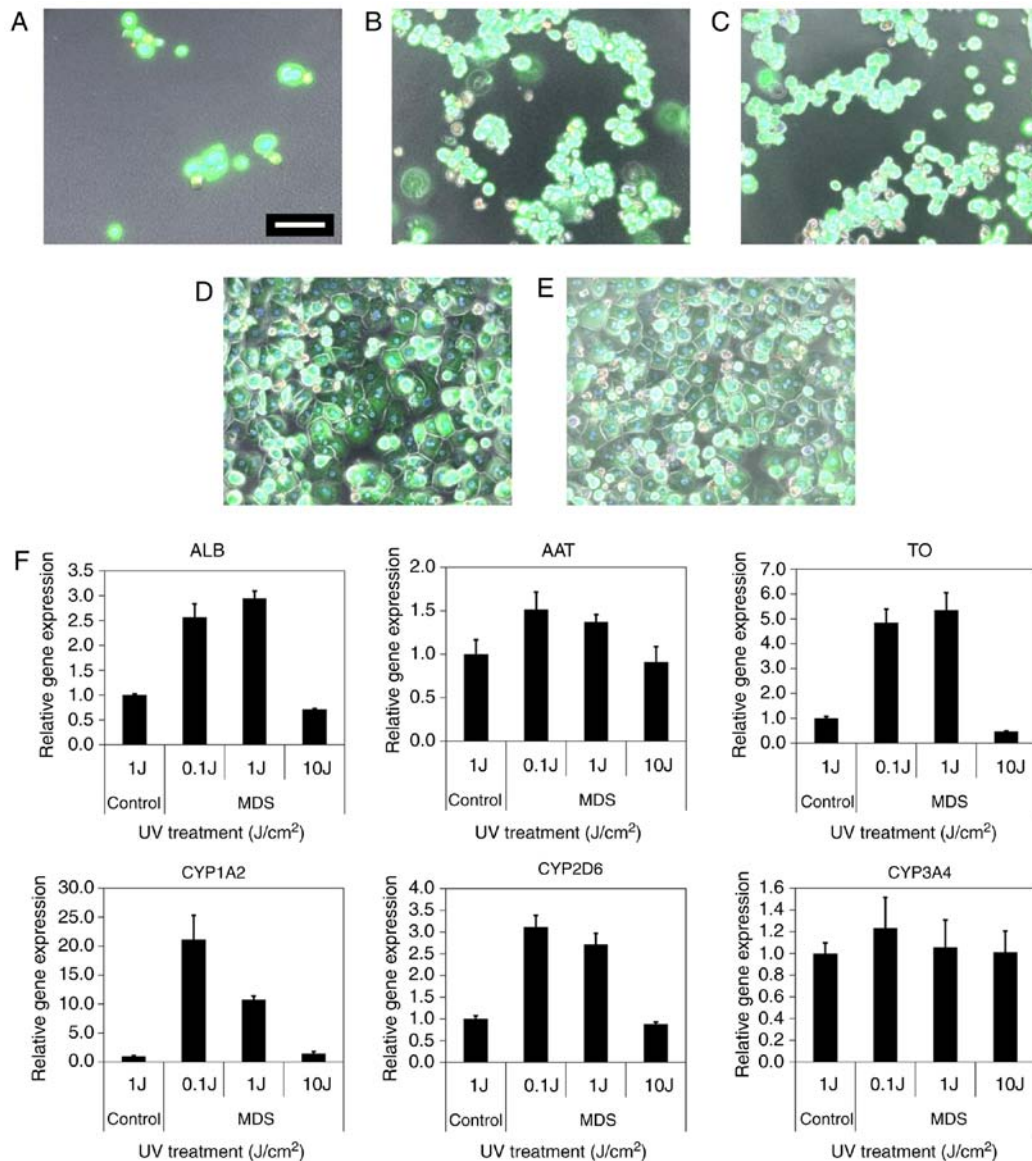

Table SI. Primers for quantitative RT-qPCR.

| Gene name      | Forward                        | Reverse                         |
|----------------|--------------------------------|---------------------------------|
| ALB            | 5'-CTTCCTGGGCATGTTTTTGT-3'     | 5'-TGGCATAGCATTTCATGAGGA-3'     |
| AAT            | 5'-AGACCCTTTGAAGTCAAGCGACC-3'  | 5'-CCATTGCTGAAGACCTTAGTGATGC-3' |
| TO             | 5'-GGCAGCGAAGAAGACAAATC-3'     | 5'-TCGAACAGAATCCAACTCCC-3'      |
| CYP1A2         | 5'-TGTTCAAGCACAGCAAGAAGG-3'    | 5'-TGCTCCAAAGATGTCATTGAC-3'     |
| CYP2D6         | 5'-ATTCATGAGGTGCAGCGCTTTGGG-3' | 5'-TCAGCACCGATGACAGGTTGGTGA-3'  |
| CYP2C9         | 5'-GGACAGAGACGACAAGCACA-3'     | 5'-CATCTGTGTAGGGCATGTGG-3'      |
| CYP2C19        | 5'-ACTTGGAGCTGGGACAGAGA-3'     | 5'-CATCTGTGTAGGGCATGTGG-3'      |
| CYP3A4         | 5'-TGTGCCTGAGAACACCAGAG-3'     | 5'-GTGGTGGAATAGTCCCGTG-3'       |
| GSTA4          | 5'-GGATGGTAACCACCTGCTG-3'      | 5'-TGCCAAAGAGATTGTGCTT-3'       |
| UGT1A1         | 5'-TGACGCCTCGTTGTACATCAG-3'    | 5'-CCTCCCTTTGGAATGGCAC-3'       |
| MRP2           | 5'-TGAGCAAGTTTGAAACGCACAT-3'   | 5'-AGCTCTTCTCCTGCCGTCTCT-3'     |
| AhR            | 5'-TGTGCCGAGTCCCATATCCG-3'     | 5'-GCAGGCGTGCATTAGACTGG-3'      |
| CAR            | 5'-TGATCAGCTGCAAGAGGAGA-3'     | 5'-AGGCCTAGCAACTTCGCATA-3'      |
| HNF4 $\alpha$  | 5'-CCACGGGCAAACACTACGG-3'      | 5'-GGCAGGCTGCTGTCCTCAT-3'       |
| PXR            | 5'-CCAGGACATACACCCTTTG-3'      | 5'-CTACCTGTGATGCCGAACAA-3'      |
| ITG $\alpha$ 1 | 5'-CCAAACATGTCTTCCACCG-3'      | 5'-CTGCTGCTGGCTCCTCAC-3'        |
| ITG $\alpha$ 2 | 5'-TCACTTGAAGGACCGGAAAA-3'     | 5'-CTGGTGTTAGCGCTCAGTCA-3'      |
| ITG $\alpha$ 3 | 5'-GGTTGGTGTAGCCATCGG-3'       | 5'-CCTCTTCGGCTACTCGGTC-3'       |
| ITG $\alpha$ 5 | 5'-AGGTAGACAGCACCACCCTG-3'     | 5'-CTCAGTGGAGTTTTACCGGC-3'      |
| ITG $\alpha$ 6 | 5'-GTTGGCTCTCTGCAGTGGAA-3'     | 5'-CCTCTTCGGCTTCTCGCT-3'        |
| ITG $\alpha$ V | 5'-TCCAAACCACTGATGGGACT-3'     | 5'-GTGACTGGTCTTCTACCCGC-3'      |
| ITG $\beta$ 1  | 5'-CCTACTTCTGCACGATGTGATG-3'   | 5'-CCTTTGCTACGGTTGGTTACATT-3'   |
| ITG $\beta$ 3  | 5'-GTGACCTGAAGGAGAATCTGC-3'    | 5'-CCGGAGTGCAATCCTCTGG-3'       |
| DDR1           | 5'-ATGGAGCAACCACAGCTTCTC-3'    | 5'-CTCAGCCGGTCAAACCTCAAAC-3'    |
| GAPDH          | 5'-GCACCGTCAAGGCTGAGAAC-3'     | 5'-ATGGTGGTGAAGACGCCAGT-3'      |
